# Supplementary material for: Enhanced performance of a photodetector based on a graphene/CVD-grown dendritic ReS2/Ta2O5 vertical heterojunction
Source: Royal Society of Chemistry journal article supplement (doi:10.1039/d3tc00351e), 2023-01-01
Supplement: d3tc00351e1.pdf [file d3tc00351e1.pdf]

## Supplementary Information

### Enhanced performance of photodetector based on graphene/CVD-grown dendritic ReS<sub>2</sub>/Ta<sub>2</sub>O<sub>5</sub> vertical heterojunction

Hyeyoon Ryu<sup>a,b</sup>, Dohee Kim<sup>a,b</sup>, Yongsu Choi<sup>a,b</sup>, Arman Kadyrov<sup>a,b</sup>, Wook Park<sup>a,b</sup>,  
and Seunghyun Lee<sup>a,b,\*</sup>

<sup>a</sup> Department of Electronic Engineering, Kyung Hee University, 17104, Rep. of Korea.

<sup>b</sup> Department of Electronics and Information Convergence Engineering,  
Kyung Hee University, 17104, Rep. of Korea.

The following provides information on the wet transfer method of graphene and ReS<sub>2</sub> used in the photodetector's heterostructure.

### 1. Graphene wet transfer method

The first step involved a thin layer of PMMA, spin-coat onto graphene on one side of the Cu foil. This layer also acts as a protective barrier for the next steps. The PMMA/graphene/Cu sample was baked at 150 °C for 90 s. Because graphene grows on both sides of the Cu foil, the graphene on the rear unprotected face was then removed by oxygen plasma. The next step is Cu substrate etching, for which various chemicals were mentioned in the literature.

### 2. ReS<sub>2</sub> wet transfer method

CVD-grown ReS<sub>2</sub> released from 300nm SiO<sub>2</sub>/Si by the etching-free transfer method was then transferred onto the substrates. The ReS<sub>2</sub> film was first spin-coated with a PMMA thin layer at 2000 rpm for 20 s and was baked at 180 °C for 15 min. And ReS<sub>2</sub> film was transferred with Di water using sonication. ReS<sub>2</sub>/PMMA was transferred onto the sample at room temperature. The next step is PMMA cleaning with acetone.

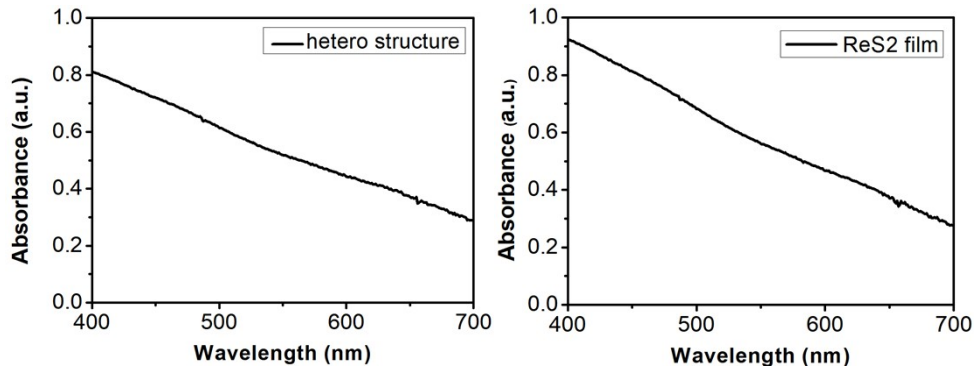

Fig. S1† The light absorption spectra of ReS<sub>2</sub> film and graphene/ReS<sub>2</sub>/Ta<sub>2</sub>O<sub>5</sub> heterostructures

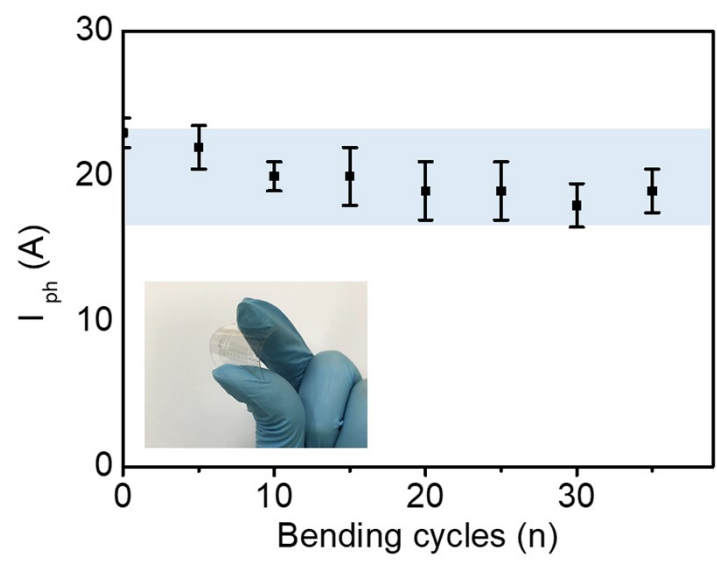

Fig. S2† The stability of the flexible device after the bending cycle

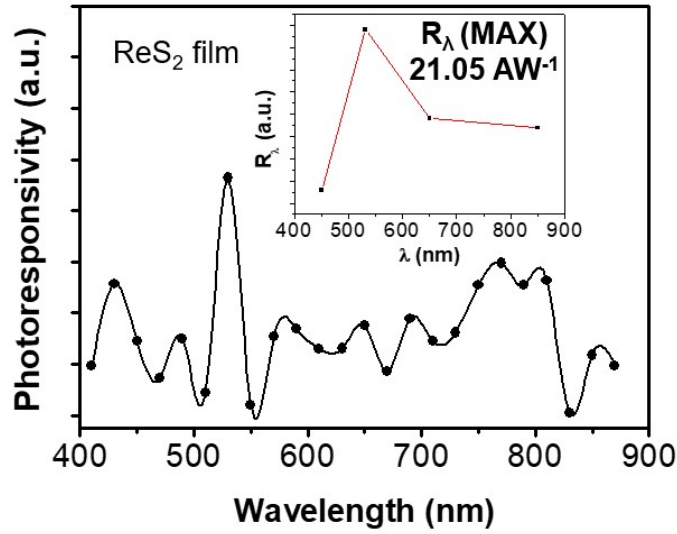

Fig. S3†  $R_{\lambda}$  values of the  $\text{ReS}_2$  film-based photodetector in the wavelength range of 410 – 870 nm with an interval of 20 nm

**Table 1.** Photodetection performance compared with the other  $\text{ReS}_2$  films.

| Structure                                     | Method      | $V_D(V_G)$       | Photo current                      | $R_{\lambda}[A/W]$ | $T_{\text{rise}}[s]$ | $T_{\text{decay}}[s]$ | Source        | Reference        |
|-----------------------------------------------|-------------|------------------|------------------------------------|--------------------|----------------------|-----------------------|---------------|------------------|
| <b>Hybrid film on glass</b>                   | <b>CVD</b>  | <b>0.1 V (-)</b> | <b>35 <math>\mu\text{A}</math></b> | <b>11.43</b>       | <b>0.06</b>          | <b>0.1</b>            | <b>532 nm</b> | <b>This work</b> |
| Hybrid flakes on $\text{SiO}_2$               | Exfoliation | 1 V (30V)        | 20 $\mu\text{A}$                   | $7 \times 10^5$    | 0.03                 | 0.03                  | 550 nm        | [1]              |
| Graphene flake on $\text{SiO}_2$              | Exfoliation | 0.1 V (30 V)     | 8 nA                               | 8.61               | -                    | -                     | 532 nm        | [2]              |
| Graphene and CQD on $\text{SiO}_2$            | CVD         | 0.3 V (-)        | -                                  | 0.4                | -                    | -                     | 635 nm        | [3]              |
| $\text{MoS}_2$ and Graphene on $\text{SiO}_2$ | CVD         | 5 V (-)          | 8.34 $\mu\text{A}$                 | 0.4                | 0.02                 | 0.03                  | 532 nm        | [4]              |
| Bilayer $\text{ReS}_2$ film on sapphire       | CVD         | 0.5 V (-)        | 2 $\mu\text{A}$                    | $4 \times 10^{-3}$ | 5.5                  | 11.7                  | 500 nm        | [5]              |
| $\text{ReS}_2$ film on mica                   | CVD         | 1 V (-)          | 5 nA                               | 0.98               | 17.8                 | 14.3                  | 490           | [6]              |
| Bilayer $\text{ReS}_2$ film on mica           | CVD         | 10 V (-)         | 2 nA                               | 0.217              | 0.61                 | 1.59                  | 325           | [7]              |

## Reference

1. Kang, B.; Kim, Y.; Yoo, W. J.; Lee, C., *Ultra-high photoresponsive device based on ReS<sub>2</sub>/graphene heterostructure*. *Small* **2018**, *14* (45), 1802593.
2. Zhang, B. Y.; Liu, T.; Meng, B.; Li, X.; Liang, G.; Hu, X.; Wang, Q. J., *Broadband high photoresponse from pure monolayer graphene photodetector*. *Nature communications* **2013**, *4* (1), 1-11.
3. Nikitskiy, I.; Goossens, S.; Kufer, D.; Lasanta, T.; Navickaite, G.; Koppens, F. H.; Konstantatos, G., *Integrating an electrically active colloidal quantum dot photodiode with a graphene phototransistor*. *Nature communications* **2016**, *7* (1), 1-8.
4. Liu, Q.; Cook, B.; Gong, M.; Gong, Y.; Ewing, D.; Casper, M.; Stramel, A.; Wu, J., *Printable transfer-free and wafer-size MoS<sub>2</sub>/Graphene van der Waals heterostructures for high-performance photodetection*. *ACS applied materials & interfaces* **2017**, *9* (14), 12728-12733.
5. Hafeez, M.; Gan, L.; Li, H.; Ma, Y.; Zhai, T., *Large-area bilayer ReS<sub>2</sub> film/multilayer ReS<sub>2</sub> flakes synthesized by chemical vapor deposition for high performance photodetectors*. *Advanced Functional Materials* **2016**, *26* (25), 4551-4560.
6. Qin, J.-K.; Shao, W.-Z.; Li, Y.; Xu, C.-Y.; Ren, D.-D.; Song, X.-G.; Zhen, L., *van der Waals epitaxy of large-area continuous ReS<sub>2</sub> films on mica substrate*. *RSC advances* **2017**, *7* (39), 24188-24194.
7. Hafeez, M.; ur Rehman, S.; Saleemi, A. S.; Saeed, M.; Zhu, L., *Role of substrate interface energy in the synthesis of high quality uniform layered ReS<sub>2</sub>*. *Applied Surface Science* **2019**, *493*, 1215-1223.
